# Supplementary material for: Accountability Through Measurement: Using a Dashboard to Address Pediatric Health Disparities
Source: Oxford University Press journal article supplement (doi:10.1542/peds.2020-024448), 2020-11-25
Supplement: peds_2020024448supplementarydata.docx [file peds_2020024448supplementarydata.docx]

Supplemental Table. Potential metrics explored during health equity index development.

| **Potential Metric** | **Notes** |
| --- | --- |
| Asthma: Well-Controlled  The percentage of children (5-17 years of age) who had a diagnosis of asthma and whose asthma was optimally controlled as defined by achieving the following:   1. Asthma well-controlled as defined by the most recent asthma control tool result (score >20) 2. Patient not at risk of exacerbation (i.e., <2 ED visits and/or hospitalizations due to asthma in the last 12 months) | Selected metric.  Reported to MN Community Measures program |
| Combo 10 Vaccine: The percentage of two-year olds who received all of the following vaccines by their second birthday:   - Fourth diphtheria, tetanus and acellular pertussis (DTaP) - Three inactivated polio (IPV) - One measures, mumps and rubella (MMR) - Three H influenza type B - Three hepatitis B - One chicken pox (VZV) - Four pneumococcal conjugate - One hepatitis A - Two or three rotavirus - Two influenza | Selected metric.  Reported to MN Community Measures program |
| No Show Appointments: Percent of patients with a scheduled appointment that were documented as “No Show” based on Ambulatory practice guidelines and clinic-specific practice. | Selected metric. |
| Comfort Promise: % of patients with ambulatory procedure (e.g. vaccine) who were offered measures to reduce pain | Selected metric. |
| 30 Day Same-Cause Inpatient Readmissions | Continuing to explore this measure |
| Overutilization per Bronchiolitis Guideline: Percent of patients of all encounter types (ED, IP, Obs, OP in a bed) with one or more of the five diagnostic/ treatment interventions that are not routinely recommended per the bronchiolitis clinical guideline: Antibiotics, Bronchodilators, Chest Xray, Systemic Corticosteroids, & Viral Testing. | Continuing to explore this measure |
| Admission of ED Patients with Acuity Score 4-5: Percent of patients given an acuity score of 4 or 5 in ED Triage that go on to be admitted to Inpatient, Observation, or Outpatient in a bed. | Continuing to explore this measure |
| 5 year survival ALL/AML: % of patients at least 18 months old alive after 5 years of treatment | Small sample size |
| Median Hemoglobin A1C: Median HgbA1C in patients with Type 1 diabetes mellitus | Small sample size |
| % of patients with ED revisit or hospital admission for asthma within 30 days of asthma ED or hospital visit discharge | Overlap with Asthma Well-Controlled measure |
| Percentage of children 3 months to 18 years of age with a diagnosis of upper respiratory infection (URI) who were not dispensed an antibiotic medication. | HEDIS measure  <https://www.ncqa.org/hedis/measures/> |
| Percentage of patients, regardless of age, with a diagnosis of HIV with a HIV viral load less than 200 copies/mL at last HIV viral load test during the measurement year. | <https://qpp.cms.gov/docs/QPP_quality_measure_specifications/Claims-Registry-Measures/2018_Measure_338_Registry.pdf> |
| Percent of patients undergoing index pediatric and/or congenital heart surgery who die, including both 1) all deaths occurring during the hospitalization in which the procedure was performed, even if after 30 days (including patients transferred to other acute care facilities), and 2) those deaths occurring after discharge from the hospital, but within 30 days of the procedure, stratified by the five STAT Mortality Levels, a multi-institutional validated complexity stratification tool. | <https://www.sts.org/quality-safety/performance-measures/descriptions#STATMortality> |
| The total number of patients requiring unscheduled readmission to the ICU within 24 hours of discharge or transfer. | <http://www.qualityforum.org/QPS/0335> |
| Proportion of infants born from 22 weeks, 0 days to 29 weeks, 6 days gestational age who were in the reporting hospital at the postnatal age recommended for screening for retinopathy of prematurity (ROP) by the American Academy of Pediatrics (AAP) and who received a retinal examination for ROP prior to discharge. | <https://public.vtoxford.org/wp-content/uploads/2018/12/NQF_Measure_0483.pdf> |
| Risk-adjusted Late Sepsis or Meningitis in Very Low Birth Weight Neonates [Nosocomial Infections] | https://public.vtoxford.org/wp-content/uploads/2018/12/NQF_Measure_0304.pdf |
| Calls to security by race/ethnicity of the patient vs. caller | Small sample size |
| “Code Green” calls | Small sample size |
| NRC survey (patient satisfaction) results | Low response rates (~15-20%) may skew results. Continuing to explore this measure. |
| Preventable harm events (e.g. falls, pressure injury) | Reporting to Solutions for Patient Safety. Continuing to explore this measure. Small sample size. |
| Medication reconciliation completion rate | Completion ≠ accurate |
| Time to antibiotics:   - Febrile infant - Neutropenic fever - Sickle Cell - Sepsis | Small sample size |
| Time to pain medication   - Long bone fracture - Surgery - Head injury | Small sample size |
| Frequency of pain assessment   - Post-operatively - Long bone fracture - Trauma | Small sample size  Different pain scales used for different ages  Challenging to extract from EHR |
| All-cause adverse events during anesthesia | Small sample size |
| CT scan rate for low-risk patients   - Abdominal pain - Head trauma | Continuing to explore this measure |
| Time to steroids for asthma – for pts > 2yrs old OR Steroids prescribed at discharge | Already have measure for asthma focus |
| Time to prep substance for lacerations in ED | Small sample size |
| US first for potential appendicitis | Continuing to explore this measure |
| IM fentanyl for long bone fractures | Small sample size |
| Completeness of triage assessment | Completion ≠ accurate |
| ED revisits within 72 hours | Continuing to explore this measure. May show differences in healthcare access as opposed to quality of initial visit. |
| Use of chemical or physical restraints for behavioral health patients | Small sample size |
| Glucose re-checks within set time after start of insulin drip / insulin administered | Small sample size |
| Viral testing for patients with bronchiolitis | Continuing to explore this measure, impacted by COVID-19 testing. |
| Triage antipyretics for febrile seizures | Small sample size |
| Discharge prescription for Epi pen after allergic reaction/anaphylaxis encounter | Small sample size |
| Referral pattern for behavioral health encounters | Referral |
| Referral pattern for Child Protective Services | Continuing to explore this measure |
| Hospital Deny Entry (Caregiver) | Continuing to explore this measure, small sample size. |
| “Respect and Dignity” Safety Learning Report | Continuing to explore this measure |
